# Supplementary material for: On the impact of vessel wall stiffness on quantitative flow dynamics in a synthetic model of the thoracic aorta
Source: Springer Nature journal article supplement (doi:10.1038/s41598-021-86174-6), 2021-03-23

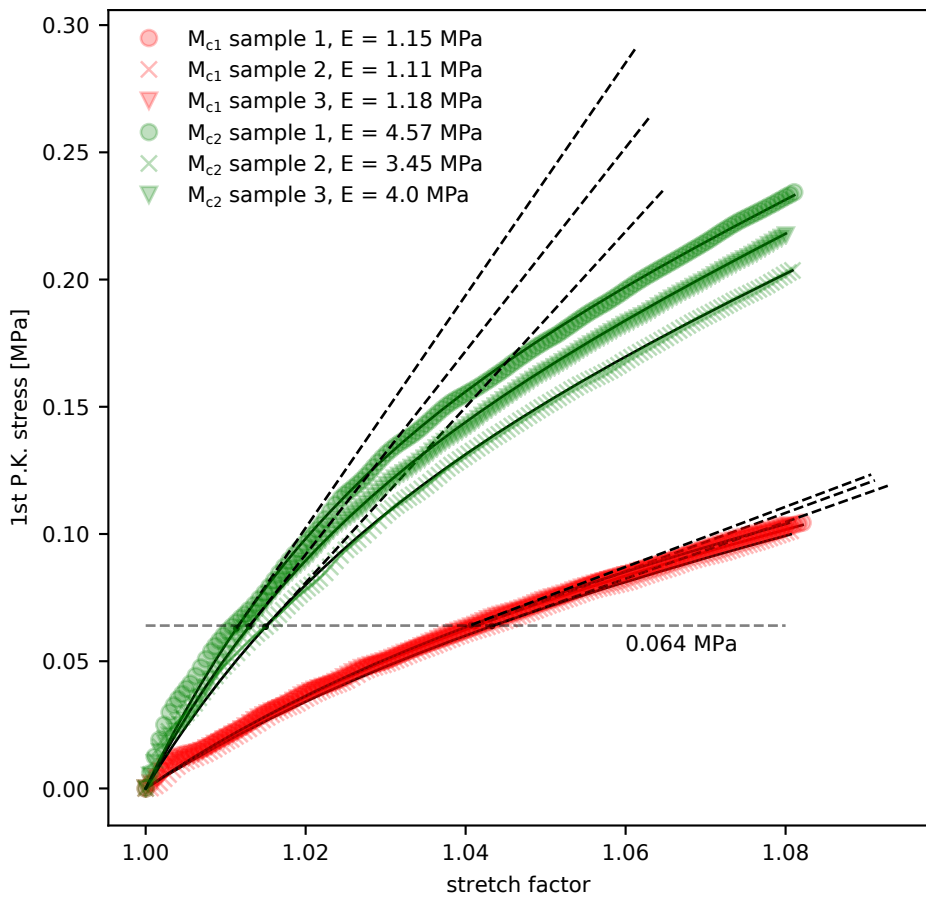

Supplement: 41598_2021_86174_MOESM1_ESM.pdf [file 41598_2021_86174_MOESM1_ESM.pdf]
